# Supplementary material
Source: MDPI journal article supplement (https://www.mdpi.com/2073-4344/9/8/650)

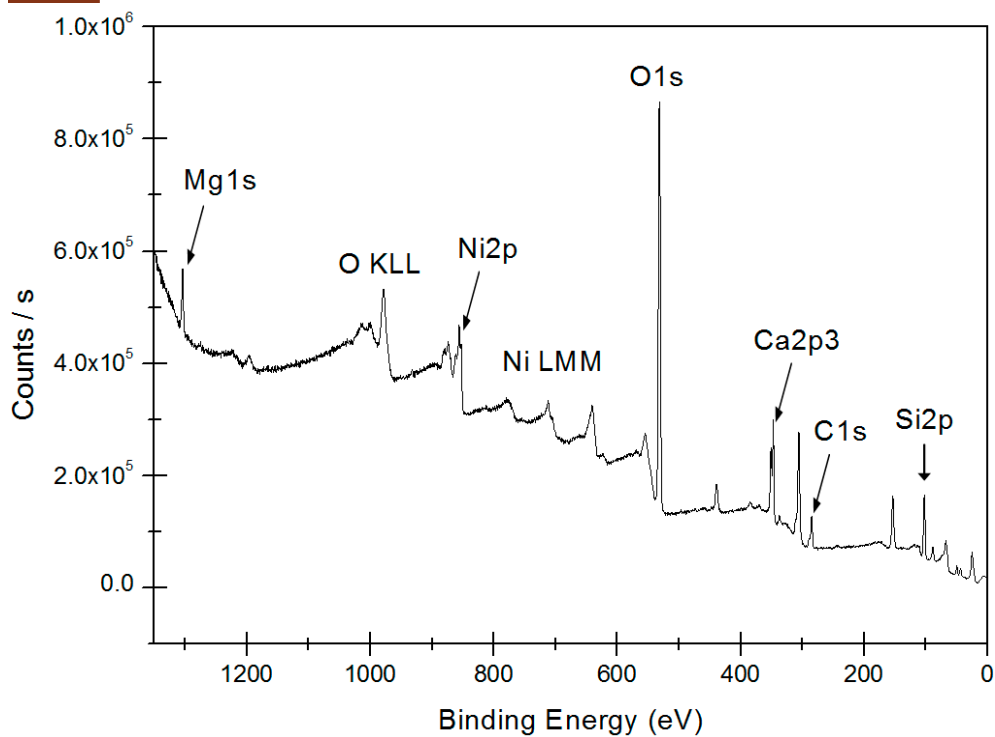

**Figure 1S.** XPS wide scan spectrum of the reduced Ni/ATP catalyst

Supplement: s1 [file s1]
